# Supplementary material
Source: publisher figshare collection journal article supplement (https://gsapubs.figshare.com/articles/dataset/_/12531827)
Supplement: Supplementary file 1 [file 1]

**Geological Society of America Data Repository for:**

## **A way to hydrothermal paroxysm, Colli Albani Volcano, Italy**

published on the Geological Society of America Bulletin by

Gianluca Vignaroli <sup>(1)</sup>, Luca Aldega <sup>(2)</sup>, Fabrizio Balsamo <sup>(3)</sup>, Andrea Billi <sup>(4,\*)</sup>, Arnaldo A. De Benedetti <sup>(1)</sup>, Luigi De Filippis <sup>(1)</sup>, Guido Giordano <sup>(1)</sup>, and Federico Rossetti <sup>(1)</sup>

<sup>(1)</sup> Dipartimento di Scienze, Sezione di Geologia, Università Roma Tre, Rome, Italy

<sup>(2)</sup> Dipartimento di Scienze della Terra, Sapienza Università di Roma, Rome, Italy

<sup>(3)</sup> Dipartimento di Fisica e Scienze della Terra, Università di Parma, Italy

<sup>(4)</sup> Consiglio Nazionale delle Ricerche, IGAG, Rome, Italy

<sup>(\*)</sup> Corresponding Author: Andrea Billi, [andrea.billi@cnr.it](mailto:andrea.billi@cnr.it), at Dipartimento Scienze della Terra (CNR-IGAG), Sapienza Università di Roma, Piazzale A. Moro 5, Rome, 00185, Italy;

Below, we provide six tables, four figures, and related captions that supplement the article entitled “A way to hydrothermal paroxysm, Colli Albani Volcano, Italy” published on the Geological Society of America Bulletin. We provide also the captions of four movies that show some exposures and sites of the study area. The movies are stored in this data repository along with this document.

## Tables

**Table DR1.** In situ permeability (Darcy) measured with the TinyPerm II Portable Air Permeameter in different rock units and sites.

| Imater quarry |              |                          |             |                | Laurentina 1   |              |              |              |              |              |              |             | Laurentina 2   |
|---------------|--------------|--------------------------|-------------|----------------|----------------|--------------|--------------|--------------|--------------|--------------|--------------|-------------|----------------|
| unaltered     |              |                          |             |                | weakly altered |              |              | altered      |              |              |              |             | altered        |
| Pozzolanelle  | Tufo Lionato | Tufo Lionato with joints | paleosol    | Pozzolane Nere | Tufo Lionato   | Tufo Lionato | Tufo Lionato | Tufo Lionato | Tufo Lionato | Tufo Lionato | Tufo Lionato | paleosol    | Pozzolane Nere |
| 3.088613658   | 0.008288468  | 3.455480198              | 0.026933631 | 2.920055979    | 0.309381799    | 0.309381799  | 0.366110337  | 0.176510545  | 0.122560349  | 0.409597     | 0.254209235  | 0.623950145 | 0.606685598    |
| 1.713378363   | 0.03467135   | 12.21483608              | 0.292497629 | 4.838857927    | 0.129635038    | 0.203096146  | 0.06250015   | 0.318185925  | 0.171626541  | 0.327241     | 0.589898755  | 1.812281631 | 1.762136241    |
| 4.089080306   | 0.445569472  | 6.229005553              | 0.049933432 | 8.970969617    | 0.240336047    | 0.203096146  | 0.208875685  | 0.149160361  | 0.557705682  | 0.606686     | 0.284404291  | 1.619872631 | 1.762136241    |
| 2.684309334   | 0.106517009  | 2.467595365              | 0.003996069 | 3.359867905    | 0.623950145    | 0.162260212  | 0.276534894  | 1.124760872  | 0.126048068  | 0.07396      | 0.097917507  | 0.527269511 | 0.527269511    |
| 1.093639014   | 0.327240593  | 0.849568004              | 0.977527927 | 3.176506825    | 0.261443307    | 0.214819693  | 0.376528797  | 1.489094474  | 0.309381799  | 0.07823      | 0.261443307  | 0.738358233 | 2.332929074    |
| 4.704967912   | 0.022760284  | 12.5624356               | 0.873744295 | 2.920055979    | 0.197476525    | 0.021518167  | 0.066107917  | 1.06337829   | 0.276534894  | 0.75937      | 0.589898755  | 0.717928041 | 0.197476525    |
| 3.865923264   | 0.10954818   | 0.950479969              | 0.512680092 | 3.865923264    | 0.192012398    | 0.433240674  | 0.214819693  | 1.258360336  | 0.327240593  | 0.589899     | 0.873744295  | 0.227219972 | 1.093639014    |
| 0.950479969   | 0.006621931  | 0.106517009              | 0.181533533 | 7.167203639    | 0.039893467    | 0.34613027   | 0.133324082  | 0.849568004  | 0.641705993  | 0.192012     | 0.030132817  | 0.47128958  | 2.399317605    |
| 1.407828788   | 0.017680797  | 3.865923264              | 0.659967122 | 4.448199484    | 0.157770512    | 0.557705682  | 0.34613027   | 0.950479969  | 0.080455717  | 0.109548     | 0.024074101  | 3.654944772 | 0.849568004    |
| 1.15676837    | 0.016253362  | 0.071913775              | 0.171626541 | 4.976558072    | 0.606685598    | 0.30082128   | 0.623950145  | 0.849568004  | 0.738358233  | 0.247175     | 0.738358233  | 1.665969602 | 1.489094474    |
| 0.849568004   | 0.082745258  | 18.09233065              | 0.849568004 | 8.481388858    | 0.129635038    | 0.276534894  | 0.717928041  | 0.950479969  | 0.036672723  | 0.376529     | 0.048551787  | 2.027545035 | 0.318185925    |
| 1.762136241   | 0.122560349  | 7.371161886              | 1.18968671  | 6.588569454    | 0.162260212    | 0.977527927  | 0.082745258  | 0.220932851  | 0.129635038  | 0.641706     | 0.498494359  | 2.920055979 | 1.713378363    |
| 4.704967912   | 0.011285545  | 15.72401647              | 1.093639014 | 4.838857927    | 0.166877677    | 0.233686007  | 0.366110337  | 0.15340504   | 0.186699462  | 0.240336     | 0.309381799  | 0.873744295 | 2.684309334    |
| 0.309381799   | 0.051354396  | 9.488810998              |             | 10.03654432    | 0.433240674    | 0.276534894  | 1.033954873  | 0.309381799  | 0.042196     | 0.826060665  | 0.149160361  | 0.048551787 |                |
| 1.033954873   | 0.100703961  | 0.166877677              |             | 5.889064454    | 0.240336047    | 0.11266561   |              | 1.97144336   | 0.069923939  | 0.186699     | 1.294169695  | 0.826060665 | 2.610035151    |
| 0.92418042    | 0.014125772  |                          |             | 5.263825537    | 0.149160361    | 0.318185925  |              | 0.157770512  | 0.044632026  | 0.12256      | 0.780979316  | 0.220932851 | 0.678747911    |
| 1.447891594   | 0.008288468  |                          |             | 9.488810998    | 0.103569709    | 0.016253362  |              |              | 0.055864542  | 0.071914     | 0.009016394  | 0.47128958  | 1.258360336    |
| 0.309381799   |              |                          |             | 7.167203639    | 0.376528797    | 0.284404291  |              |              | 0.031872207  | 0.12256      | 0.018701405  | 1.330998087 | 0.208875685    |
| 0.141020099   |              |                          |             | 8.018526429    | 0.355980154    | 0.318185925  |              |              | 0.071913775  | 0.112666     | 0.06250015   | 0.898608574 | 0.33655293     |
| 1.093639014   |              |                          |             | 12.91992682    | 0.826060665    | 0.284404291  |              |              | 0.030132817  | 0.055865     | 0.047208371  | 1.665969602 | 0.197476525    |
| 3.758954113   |              |                          |             | 8.246710903    | 0.33655293     | 0.366110337  |              |              | 0.035657998  | 0.007408     | 0.220932851  |             | 0.157770512    |
| 4.838857927   |              |                          |             | 11.87685455    | 0.085099953    | 0.261443307  |              |              | 0.030990311  | 0.181534     |              |             | 0.233686007    |
| 34.49667492   |              |                          |             | 6.056650492    | 0.33655293     | 0.035657998  |              |              | 0.355980154  | 0.573576     |              |             | 0.254209235    |
| 27.56053187   |              |                          |             | 6.056650492    | 0.977527927    | 0.126048068  |              |              | 0.085099953  |              |              |             | 0.106517009    |
| 48.30718146   |              |                          |             | 13.6657183     | 0.247175327    | 0.080455717  |              |              | 0.103569709  |              |              |             | 0.34613027     |
|               |              |                          |             | 8.970969617    | 0.149160361    | 0.073960237  |              |              | 0.06798916   |              |              |             | 0.318185925    |
|               |              |                          |             | 2.760697149    |                | 0.659967122  |              |              | 0.029299049  |              |              |             | 0.197476525    |
|               |              |                          |             | 15.28893678    |                | 0.445569472  |              |              |              |              |              |             | 0.181533533    |
|               |              |                          |             | 0.623950145    |                | 0.076064935  |              |              |              |              |              |             | 0.484701142    |
|               |              |                          |             | 5.118176772    |                | 0.366110337  |              |              |              |              |              |             | 0.780979316    |
|               |              |                          |             | 6.776061416    |                | 0.276534894  |              |              |              |              |              |             |                |
|               |              |                          |             | 6.776061416    |                |              |              |              |              |              |              |             |                |
|               |              |                          |             | 17.10496169    |                |              |              |              |              |              |              |             |                |
|               |              |                          |             | 5.889064454    |                |              |              |              |              |              |              |             |                |
|               |              |                          |             | 2.684309334    |                |              |              |              |              |              |              |             |                |
|               |              |                          |             | 7.796655763    |                |              |              |              |              |              |              |             |                |
|               |              |                          |             | 7.580924205    |                |              |              |              |              |              |              |             |                |
|               |              |                          |             | 5.726115481    |                |              |              |              |              |              |              |             |                |
|               |              |                          |             | 1.762136241    |                |              |              |              |              |              |              |             |                |
|               |              |                          |             | 3.176506825    |                |              |              |              |              |              |              |             |                |
|               |              |                          |             | 1.15676837     |                |              |              |              |              |              |              |             |                |
|               |              |                          |             | 1.916894004    |                |              |              |              |              |              |              |             |                |

**Table DR2.** Samples, sampling sites, and laboratory analyses.

| Samples | Location             | Units          | Degree of alteration | Meso-structure                      | Petrography | BSE-EDS | XRD | Geochemistry | He pycnometry |
|---------|----------------------|----------------|----------------------|-------------------------------------|-------------|---------|-----|--------------|---------------|
| AGL 00  | Imater quarry        | Tufo Lionato   | no                   | bedding                             | X           | X       | X   | X            | X             |
| AGL01   | Laurentina 1         | Tufo Lionato   | high                 | mushroom-like structure             | X           |         | X   |              |               |
| AGL 02  | Laurentina 1         | Tufo Lionato   | high                 | mushroom-like structure             | X           | X       | X   | X            | X             |
| AGL 03  | Laurentina 1         | Tufo Lionato   | medium-high          | horizontal foliation                |             |         | X   | X            | X             |
| AGL 04  | Laurentina 1         | Tufo Lionato   | medium-high          | horizontal foliation                | X           | X       | X   | X            | X             |
| AGL 05  | Laurentina 1         | Tufo Lionato   | no-very low          | preserved lithon                    | X           |         | X   | X            | X             |
| AGL 06  | Laurentina 1         | paleosol       | medium               | bedding                             |             |         |     |              |               |
| AGL 07  | Laurentina 1         | paleosol       | medium               | bedding                             |             |         |     |              |               |
| AGL 08  | Laurentina 1         | Tufo Lionato   | no-very low          | preserved lithon                    |             |         |     |              |               |
| AGL 09  | Laurentina 1         | Tufo Lionato   | high                 | mushroom-like structure             |             |         |     |              |               |
| AGL 10  | Laurentina 1         | Tufo Lionato   | medium-high          | horizontal foliation                |             |         |     |              |               |
| AGL 11  | Laurentina 1         | Tufo Lionato   | medium               | concentric zonation halo            |             |         |     |              |               |
| AGL 12  | Laurentina 1         | Tufo Lionato   | high                 | fracture in mushroom-like structure |             |         |     |              |               |
| AGL 13  | Laurentina 2         | Pozzolane nere | medium-high          | Liesegang-like bands                |             |         |     |              |               |
| AGL 14  | Laurentina 2         | Tufo Lionato   | medium-high          | alteration halo                     |             |         | X   |              |               |
| AGL 15  | Laurentina 2         | Tufo Lionato   | medium-high          | alteration halo                     |             |         | X   |              |               |
| AGL 16  | Laurentina 2         | Tufo Lionato   | medium-high          | alteration halo                     |             |         | X   |              |               |
| AGL 17  | Laurentina 2         | paleosol       | medium-high          | bedding                             |             |         |     |              |               |
| AGL 18  | Laurentina 4         | Tufo Lionato   | no-very low          | preserved lithon                    |             |         |     |              |               |
| AGL 19  | Laurentina 4         | Tufo Lionato   | very low             | preserved lithon                    |             |         |     |              |               |
| AGL 20  | Laurentina 4         | Tufo Lionato   | medium               | horizontal foliation                |             |         |     |              |               |
| AGL 21  | Laurentina 4         | Tufo Lionato   | medium-high          | concentric zonation halo            |             |         |     |              |               |
| AGL 22  | Laurentina 4         | Tufo Lionato   | medium-high          | concentric zonation halo            |             |         |     |              |               |
| AGL 23  | Laurentina 4         | Tufo Lionato   | medium-high          | concentric zonation halo            |             |         |     |              |               |
| AGL 24  | Laurentina 4         | Tufo Lionato   | very low             | concentric zonation halo            |             |         |     |              |               |
| AGL 25  | Laurentina 4         | Tufo Lionato   | no-very low          | concentric zonation halo            |             |         | X   | X            | X             |
| AGL 26  | Laurentina 4         | Tufo Lionato   | medium               | concentric zonation halo            | X           |         | X   | X            | X             |
| AGL 27  | Laurentina 4         | Tufo Lionato   | medium-high          | concentric zonation halo            |             |         | X   | X            | X             |
| AGL 28  | Laurentina 4         | Tufo Lionato   | medium-high          | concentric zonation halo            |             |         | X   | X            | X             |
| AGL 29  | Laurentina 4         | Tufo Lionato   | medium-high          | concentric zonation halo            | X           | X       | X   | X            | X             |
| AGL 30  | Laurentina 4         | Tufo Lionato   | medium-high          | concentric zonation halo            | X           |         | X   | X            | X             |
| AGL 31  | Laurentina 4         | Tufo Lionato   | medium-high          | concentric zonation halo            | X           |         | X   | X            | X             |
| AGL 32  | Laurentina 4         | Tufo Lionato   | medium-high          | fracture with oxides                |             |         |     |              |               |
| AGL 33  | Laurentina 1         | Tufo Lionato   | high                 | actual sulphides                    |             |         |     |              |               |
| AGL 34  | Laurentina 1         | Tufo Lionato   | high                 | mushroom-like structure             |             |         |     |              |               |
| AGL35a  | Laurentina 3         | Tufo Lionato   | medium-high          | breccia structure                   | X           |         |     |              |               |
| AGL35b  | Laurentina 3         | Tufo Lionato   | medium-high          | breccia structure                   |             |         |     |              |               |
| AGL35c  | Laurentina 3         | Tufo Lionato   | medium-high          | breccia structure                   | X           |         |     |              |               |
| AGL35d  | Laurentina 3         | Tufo Lionato   | medium-high          | breccia structure                   |             |         |     |              |               |
| AGL36a  | not used             | Tufo Lionato   | high                 | mushroom-like structure             |             |         |     |              |               |
| AGL36b  | not used             | Tufo Lionato   | high                 | mushroom-like structure             | X           |         |     |              |               |
| AGL 37a | Zolforata di Pomezia | Tufo Lionato   | medium-high          | breccia structure                   | X           |         |     |              |               |
| AGL 37b | Zolforata di Pomezia | Tufo Lionato   | medium-high          | breccia structure                   |             |         |     | X            | X             |
| AGL 37c | Zolforata di Pomezia | Tufo Lionato   | medium-high          | breccia structure                   | X           |         |     |              |               |
| AGL37d  | Zolforata di Pomezia | Tufo Lionato   | medium-high          | breccia structure                   |             |         |     |              |               |
| AGL ps1 | Zolforata di Pomezia | paleosol       | high                 | Liesegang-like bands                | X           |         |     |              |               |
| AGL ps2 | Zolforata di Pomezia | paleosol       | high                 | Liesegang-like bands                |             |         |     | X            | X             |
| AGL ps3 | Imater quarry        | paleosol       | no                   | bedding                             |             |         |     | X            | X             |
| AGL ps4 | Imater quarry        | paleosol       | no                   | bedding                             | X           |         |     |              |               |
| AGL 45  | Zolforata di Pomezia | Pozzolane Nere | high                 | Liesegang-like bands                |             |         | X   | X            | X             |
| AGL 46  | Zolforata di Pomezia | Tufo Lionato   | high                 | breccia structure                   |             |         | X   | X            | X             |
| AGL 47  | Zolforata di Pomezia | Pozzolanelle   | no-very low          | bedding                             |             |         | X   | X            | X             |
| AGL 48  | Imater quarry        | Pozzolanelle   | no                   | bedding                             |             |         | X   | X            | X             |
| AGL 49  | Imater quarry        | Pozzolane nere | no                   | bedding                             |             |         | X   | X            | X             |

**Table DR3.** X-ray diffraction mineralogical assemblages for the Tufo Lionato. Keys: Ab: Albite; Am: amorphous material; Anl: Analcime; Aug: Augite; Brt: Barite; Cbz: Chabazite; Gr: Greigite; Gt: Goethite; Hal-7: Halloysite-7Å; Hal-10: Halloysite-10Å; Jar: Jarosite; Kfs: K-feldspar; Lct: Leucite; Mgh: Maghemite; Mrc: Marcasite; Ph: Phlogopite; Phl: Phillipsite; Py: Pyrite; Qtz: Quartz; S: native Sulfur; and Sm: Smectite.

| Sample | Locality             | Unit           | Meso-structure           | Whole rock mineral composition |     |     |     |     |     |     |    |     |    |       |        |     |    |    |     |    |   |     |     |    |
|--------|----------------------|----------------|--------------------------|--------------------------------|-----|-----|-----|-----|-----|-----|----|-----|----|-------|--------|-----|----|----|-----|----|---|-----|-----|----|
|        |                      |                |                          | Ph                             | Phl | Cbz | Aug | Lct | Anl | Kfs | Ab | Qtz | Sm | Hal-7 | Hal-10 | Mgh | Gt | Gr | Mrc | Py | S | Jar | Brt | Am |
| AGL48  | Imater quarry        | Pozzolanelle   | bedding                  | *                              |     |     | *   | *   | *   |     |    |     |    |       | *      | *   |    |    |     |    |   |     |     |    |
| AGL00  | Imater quarry        | Tufo Lionato   | bedding                  |                                | *   | *   | *   | *   | *   |     |    |     | *  |       | *      |     |    |    |     |    |   |     |     |    |
| AGLps3 | Imater quarry        | paleosol       | bedding                  | *                              |     |     | *   |     |     |     | *  | *   | *  |       | *      |     |    |    |     |    |   |     |     |    |
| AGL49  | Imater quarry        | Pozzolane Nere | bedding                  | *                              |     |     | *   | *   | *   |     |    |     |    |       | *      | *   |    |    |     |    |   |     |     |    |
| AGL47  | Zolforata di Pomezia | Pozzolanelle   | bedding                  | *                              |     |     | *   | *   |     |     |    |     |    |       | *      | *   |    |    |     |    |   | *   |     |    |
| AGL37  | Zolforata di Pomezia | Tufo Lionato   | breccia fractures        |                                |     |     |     |     |     |     | *  |     |    |       | *      | *   |    |    |     | *  | * | *   | *   | *  |
| AGL46  | Zolforata di Pomezia | Tufo Lionato   | breccia fractures        |                                |     |     |     |     |     |     | *  |     |    |       |        | *   |    |    |     | *  | * | *   | *   | *  |
| AGLps2 | Zolforata di Pomezia | paleosol       | Liesegang-like band      | *                              |     |     | *   |     |     |     | *  | *   | *  |       |        | *   |    | *  |     |    |   |     |     | *  |
| AGL45  | Zolforata di Pomezia | Pozzolane Nere | Liesegang-like band      |                                |     |     |     | *   |     |     |    |     |    |       |        |     |    |    |     | *  | * | *   | *   | *  |
| AGL01  | Laurentina1          | Tufo Lionato   | mushroom-like alteration | *                              |     |     |     |     |     |     |    |     |    |       | *      | *   |    |    | *   | *  |   | *   | *   | *  |
| AGL02  | Laurentina1          | Tufo Lionato   | mushroom stem            |                                |     |     |     |     |     |     |    |     |    |       | *      | *   |    | *  | *   | *  |   | *   | *   | *  |
| AGL03  | Laurentina1          | Tufo Lionato   | horizontal foliation     | *                              |     |     |     |     |     |     |    |     |    |       | *      | *   |    |    |     |    | * | *   | *   |    |
| AGL04  | Laurentina1          | Tufo Lionato   | horizontal foliation     | *                              |     |     |     |     |     |     |    |     |    |       | *      | *   |    |    |     |    | * | *   | *   |    |
| AGL05  | Laurentina1          | Tufo Lionato   | preserved lithon         | *                              |     |     | *   |     |     |     |    |     |    |       | *      | *   |    |    |     |    |   | *   | *   |    |
| AGL14  | Laurentina2          | Tufo Lionato   | alteration halo          |                                |     |     |     |     |     |     |    |     | *  |       | *      | *   |    | *  |     |    |   | *   |     | *  |
| AGL15  | Laurentina2          | Tufo Lionato   | alteration halo          |                                |     |     |     |     |     |     |    |     | *  |       | *      | *   |    | *  |     |    |   | *   |     | *  |
| AGL16  | Laurentina2          | Tufo Lionato   | alteration halo          |                                |     |     |     |     |     |     |    |     | *  |       | *      | *   |    |    |     |    |   | *   |     | *  |
| AGL25  | Laurentina4          | Tufo Lionato   | concentric zonation halo |                                |     |     | *   |     |     |     |    |     |    |       | *      | *   | *  |    |     |    |   |     | *   | *  |
| AGL26  | Laurentina4          | Tufo Lionato   | concentric zonation halo | *                              |     |     | *   |     |     |     |    |     |    |       | *      | *   |    |    |     |    |   |     | *   | *  |
| AGL27  | Laurentina4          | Tufo Lionato   | concentric zonation halo | *                              |     |     |     |     |     |     |    |     |    |       | *      | *   |    |    |     |    |   |     | *   | *  |
| AGL28  | Laurentina4          | Tufo Lionato   | concentric zonation halo |                                |     |     | *   |     |     |     |    |     | *  |       | *      | *   |    |    |     |    |   |     | *   | *  |
| AGL29  | Laurentina4          | Tufo Lionato   | concentric zonation halo | *                              |     |     | *   |     |     |     |    |     |    |       | *      | *   |    | *  |     |    |   |     |     | *  |
| AGL30  | Laurentina4          | Tufo Lionato   | concentric zonation halo |                                |     |     | *   |     |     |     |    |     | *  |       | *      | *   |    | *  |     |    |   |     |     | *  |
| AGL31  | Laurentina4          | Tufo Lionato   | concentric zonation halo |                                |     |     |     |     |     |     |    |     | *  |       | *      | *   |    |    |     |    |   | *   |     | *  |

Table DR4. Results from the whole rock geochemical analysis.

| Facies Unit Location Structure     |          | u TL ImQ bedding | a TL L1 ms-like | a TL L1 hor fol | a TL L1 hor fol | lu TL L1 pres lith | lu TL L4 pres lith | a TL L4 czh | a TL Zolf fp | a TL Zolf hor fol | u Pn ImQ bedding | a Pn Zolf vah | u Pzz ImQ bedding | lu Pzz Zolf bedding | u Ps ImQ bedding | a Ps Zolf vah |
|------------------------------------|----------|------------------|-----------------|-----------------|-----------------|--------------------|--------------------|-------------|-------------|-------------|-------------|-------------|-------------|--------------|-------------------|------------------|---------------|-------------------|---------------------|------------------|---------------|
| Samples                            |          | AGL 00           | AGL 02          | AGL 03          | AGL 04          | AGL 05             | AGL 25             | AGL 26      | AGL 27      | AGL 28      | AGL 29      | AGL 30      | AGL 31      | AGL37b       | AGL 46            | AGL 49           | AGL 45        | AGL 48            | AGL 47              | AGL ps3          | AGL ps2       |
| SiO <sub>2</sub>                   | (%)      | 43.95            | 41              | 45.32           | 46.52           | 46.54              | 37.69              | 47.88       | 42.13       | 37.08       | 41.27       | 37.21       | 49.2        | 45.14        | 38.16             | 48.13            | 82.06         | 45.27             | 45.83               | 46.73            | 56.3          |
| TiO <sub>2</sub>                   | (%)      | 0.725            | 0.642           | 0.75            | 0.767           | 0.726              | 0.895              | 0.886       | 0.779       | 0.752       | 0.782       | 0.644       | 0.938       | 0.683        | 0.596             | 0.708            | 1.187         | 0.823             | 0.887               | 0.999            | 1.33          |
| Al <sub>2</sub> O <sub>3</sub>     | (%)      | 17.78            | 17.99           | 17.39           | 16.19           | 19.61              | 22.51              | 20.62       | 20.63       | 19.42       | 19.19       | 12.25       | 19.14       | 17.53        | 30.46             | 18.68            | 2.63          | 17.79             | 20.65               | 21.56            | 9.85          |
| Fe <sub>2</sub> O <sub>3</sub> (T) | (%)      | 8.05             | 6.95            | 7.74            | 3.51            | 6.28               | 9.37               | 3.74        | 7.92        | 9.96        | 10.69       | 18.84       | 4.98        | 6.3          | 2.75              | 7.31             | 1.12          | 8.08              | 6.82                | 9.59             | 4.6           |
| MnO                                | (%)      | 0.175            | 0.015           | 0.007           | 0.004           | 0.034              | 0.108              | 0.021       | 0.025       | 0.036       | 0.011       | 0.013       | 0.011       | 0.01         | 0.003             | 0.179            | 0.005         | 0.171             | 0.103               | 0.147            | 0.008         |
| MgO                                | (%)      | 2.17             | 0.06            | 0.15            | 0.06            | 0.74               | 0.8                | 0.7         | 0.69        | 0.65        | 0.53        | 0.44        | 0.49        | 0.17         | 0.07              | 2.35             | 0.06          | 3.67              | 2.99                | 1.68             | 0.22          |
| CaO                                | (%)      | 4.81             | 0.16            | 0.52            | 0.11            | 1.05               | 1.14               | 1.08        | 0.89        | 0.65        | 0.64        | 0.7         | 0.79        | 0.13         | 0.1               | 5.32             | 0.29          | 8.23              | 6.32                | 2.44             | 0.21          |
| Na <sub>2</sub> O                  | (%)      | 0.71             | 0.07            | 0.11            | 0.07            | 0.1                | 0.11               | 0.17        | 0.14        | 0.13        | 0.12        | 0.1         | 0.16        | 0.11         | 0.04              | 0.77             | 0.02          | 2.44              | 0.16                | 0.62             | 0.81          |
| K <sub>2</sub> O                   | (%)      | 5.35             | 0.58            | 0.94            | 0.74            | 0.75               | 0.8                | 1.48        | 1.07        | 0.83        | 1.1         | 0.77        | 1.46        | 0.79         | 1.14              | 8.74             | 0.51          | 3.73              | 0.87                | 2.36             | 4.03          |
| P <sub>2</sub> O <sub>5</sub>      | (%)      | 0.18             | 0.26            | 0.32            | 0.31            | 0.28               | 0.16               | 0.47        | 0.25        | 0.2         | 0.28        | 0.46        | 0.19        | 0.39         | 0.65              | 0.35             | 0.25          | 0.45              | 0.36                | 0.35             | 0.23          |
| LOI                                | (%)      | 13.54            | 30.4            | 24.34           | 29.76           | 21.47              | 24.95              | 19.98       | 23.34       | 28.95       | 23.2        | 27.2        | 21.89       | 28.66        | 26.3              | 5.41             | 10.63         | 6.97              | 14                  | 13.09            | 20.6          |
| Total                              | (%)      | 97.44            | 98.13           | 97.58           | 98.04           | 97.58              | 98.53              | 97.02       | 97.87       | 98.63       | 97.8        | 98.63       | 99.25       | 99.9         | 100.2             | 97.95            | 98.77         | 97.61             | 98.99               | 99.56            | 98.19         |
| S                                  | (p.p.m.) | bdl              | na              | na              | na              | na                 | na                 | na          | na          | na          | na          | na          | na          | na           | 14000             | 100              | 5700          | 400               | 1800                | 200              | 21800         |
| As                                 | (p.p.m.) | 22               | 35              | 77              | 43              | 69                 | 51                 | 61          | 43          | 46          | 140         | 191         | 64          | 51           | 33                | 33               | 29            | 15                | 10                  | 74               | 57            |
| Cs                                 | (p.p.m.) | 30               | 21.8            | 21              | 24.8            | 34.5               | 1.7                | 13.8        | 9.6         | 6.2         | 8.9         | 8           | 15.6        | 56.2         | 4.6               | 32.4             | 25.9          | 34.2              | 54.4                | 28.3             | 28.8          |
| Rb                                 | (p.p.m.) | 244              | 44              | 62              | 45              | 65                 | 37                 | 123         | 71          | 46          | 65          | 54          | 88          | 314          | 39                | 413              | 111           | 655               | 144                 | 147              | 186           |
| Ba                                 | (p.p.m.) | 3055             | 491             | 4002            | 3955            | 3428               | 2155               | 8058        | 4197        | 2298        | 3520        | 2366        | 5389        | 3255         | 6665              | 3801             | 4202          | 3180              | 2411                | 1002             | 1461          |
| Sr                                 | (p.p.m.) | 5185             | 458             | 640             | 453             | 399                | 395                | 1190        | 582         | 339         | 413         | 729         | 461         | 416          | 1891              | 1249             | 970           | 853               | 676                 | 741              | 601           |
| Pb                                 | (p.p.m.) | 173              | 166             | 149             | 180             | 210                | 231                | 232         | 170         | 161         | 173         | 233         | 227         | 283          | 118               | 37               | 305           | 55                | 35                  | 153              | 52            |
| Ga                                 | (p.p.m.) | 21               | 17              | 21              | 23              | 22                 | 26                 | 26          | 24          | 23          | 22          | 18          | 27          | 19           | 24                | 24               | 7             | 22                | 24                  | 24               | 12            |
| Ge                                 | (p.p.m.) | 2                | 1.4             | 1.3             | 1.8             | 1.8                | 2.3                | 2.3         | 2.6         | 3.1         | 2.3         | 1.6         | 2.4         | 1.7          | 1.3               | 1.6              | 0.8           | 2.1               | 1.8                 | 3.2              | 0.7           |
| Zn                                 | (p.p.m.) | 130              | < 30            | 60              | < 30            | 80                 | 140                | 90          | 110         | 170         | 100         | 90          | 90          | < 30         | 30                | 100              | < 30          | 90                | 100                 | 110              | < 30          |
| Bi                                 | (p.p.m.) | 2.3              | 1.5             | 1.7             | 2               | 2.7                | 3.6                | 3           | 2.3         | 1.8         | 2.2         | 2.1         | 2.6         | 0.3          | 3.5               | 0.3              | 11.6          | 0.5               | 0.2                 | 1.5              | < 0.1         |
| U                                  | (p.p.m.) | 12               | 24.2            | 12.9            | 14.1            | 15.2               | 22.1               | 18.6        | 31.7        | 27.9        | 31          | 24.1        | 31.2        | 20.7         | 24.3              | 18               | 4.3           | 17.9              | 23                  | 18.8             | 9.72          |
| Zr                                 | (p.p.m.) | 461              | 402             | 480             | 470             | 441                | 546                | 537         | 488         | 481         | 503         | 399         | 603         | 420          | 417               | 392              | 587           | 381               | 459                 | 454              | 487           |
| Hf                                 | (p.p.m.) | 7.6              | 7.1             | 8.1             | 8.2             | 7.9                | 9.7                | 8.9         | 7.9         | 7.9         | 7.7         | 6.2         | 9.7         | 7.8          | 8.1               | 7.8              | 12.7          | 8.5               | 9.8                 | 11.2             | 11.4          |
| Y                                  | (p.p.m.) | 39.6             | 15.8            | 21.3            | 36.7            | 72.6               | 42.8               | 28.9        | 39          | 52.8        | 20.9        | 21.1        | 26.1        | 16.6         | 4.2               | 31.6             | 2.3           | 42.5              | 30.3                | 41.3             | 6.8           |
| Nb                                 | (p.p.m.) | 44.9             | 42.4            | 47.6            | 49              | 39.6               | 56.5               | 48.1        | 49.5        | 50.7        | 51.9        | 39          | 62.8        | 46.3         | 37                | 54.4             | 53.7          | 36.6              | 46.1                | 31.6             | 40.7          |
| Ta                                 | (p.p.m.) | 1.85             | 1.68            | 2               | 2.07            | 1.77               | 2.42               | 2.3         | 2.22        | 1.89        | 2.08        | 1.58        | 2.53        | 2            | 1.63              | 2.05             | 2.57          | 1.52              | 1.84                | 1.79             | 2.25          |
| Th                                 | (p.p.m.) | 99.7             | 87              | 93.6            | 116             | 99.9               | 127                | 125         | 109         | 105         | 107         | 87.7        | 136         | 83           | 130               | 104              | 35.8          | 86.5              | 99                  | 85.5             | 19.4          |
| Tl                                 | (p.p.m.) | 3.49             | 4.82            | 3.02            | 4.7             | 1.17               | 0.57               | 2.02        | 1.69        | 1.25        | 1.57        | 2.03        | 4.43        | 0.35         | 2.04              | 0.25             | 5.44          | 0.74              | 2.75                | 2.17             | 2.79          |
| La                                 | (p.p.m.) | 205              | 157             | 195             | 264             | 279                | 253                | 181         | 265         | 285         | 108         | 219         | 151         | 50.5         | 473               | 218              | 141           | 186               | 138                 | 167              | 33.5          |
| Ce                                 | (p.p.m.) | 315              | 212             | 255             | 420             | 519                | 415                | 276         | 511         | 567         | 177         | 278         | 249         | 90.7         | 769               | 377              | 169           | 326               | 238                 | 323              | 47.8          |
| Pr                                 | (p.p.m.) | 37               | 19.6            | 24.4            | 43.9            | 60.5               | 47.4               | 28.4        | 55.6        | 58.3        | 17.9        | 21.6        | 30.3        | 10.2         | 68                | 38.1             | 12.1          | 38.1              | 27.3                | 34.2             | 4.11          |
| Nd                                 | (p.p.m.) | 129              | 62.3            | 74.7            | 146             | 217                | 163                | 96.6        | 189         | 209         | 58.7        | 64.2        | 104         | 38           | 158               | 125              | 28.2          | 136               | 96.3                | 125              | 13            |
| Sm                                 | (p.p.m.) | 21.5             | 10.3            | 11              | 24.6            | 36.6               | 27.2               | 16          | 31.1        | 35.5        | 10          | 9.18        | 17.4        | 7.22         | 11                | 19.2             | 2.33          | 23.4              | 16.8                | 21.8             | 1.92          |
| Eu                                 | (p.p.m.) | 3.95             | 1.97            | 2.14            | 4.64            | 7.37               | 5.28               | 2.57        | 5.47        | 6.68        | 1.62        | 1.65        | 2.92        | 1.46         | 1.53              | 3.81             | 0.327         | 4.68              | 3.3                 | 4.22             | 0.593         |
| Gd                                 | (p.p.m.) | 13.8             | 5.82            | 6.86            | 15.8            | 24                 | 17.7               | 8.57        | 14.6        | 19.7        | 5.54        | 5.35        | 8.33        | 5.91         | 3.52              | 12.8             | 1.06          | 15.8              | 11.4                | 15.6             | 1.49          |
| Tb                                 | (p.p.m.) | 1.75             | 0.7             | 0.86            | 1.95            | 3.26               | 2.27               | 1.11        | 1.94        | 2.62        | 0.79        | 0.75        | 1.12        | 0.82         | 0.31              | 1.56             | 0.15          | 1.98              | 1.45                | 1.94             | 0.21          |
| Dy                                 | (p.p.m.) | 8.14             | 3.25            | 4.13            | 8.97            | 15.4               | 10.5               | 5.89        | 9.38        | 12.8        | 4.29        | 4.46        | 5.65        | 3.79         | 1.48              | 7.1              | 0.66          | 9.14              | 7.04                | 9.16             | 1.17          |
| Ho                                 | (p.p.m.) | 1.42             | 0.58            | 0.7             | 1.42            | 2.62               | 1.71               | 1.02        | 1.55        | 2.07        | 0.77        | 0.86        | 0.96        | 0.62         | 0.24              | 1.18             | 0.11          | 1.56              | 1.12                | 1.51             | 0.23          |
| Er                                 | (p.p.m.) | 3.75             | 1.55            | 1.8             | 3.64            | 7.15               | 4.28               | 2.58        | 3.83        | 5.08        | 2.05        | 2.45        | 2.4         | 1.68         | 0.67              | 3.01             | 0.3           | 4.06              | 2.83                | 3.89             | 0.72          |
| Tm                                 | (p.p.m.) | 0.498            | 0.22            | 0.247           | 0.467           | 0.985              | 0.552              | 0.324       | 0.491       | 0.691       | 0.297       | 0.357       | 0.357       | 0.232        | 0.088             | 0.403            | 0.046         | 0.526             | 0.386               | 0.532            | 0.114         |
| Yb                                 | (p.p.m.) | 3                | 1.4             | 1.53            | 2.95            | 5.98               | 3.31               | 1.9         | 2.93        | 4.22        | 1.95        | 2.33        | 2.39        | 1.4          | 0.5               | 2.32             | 0.26          | 2.87              | 2.42                | 3.25             | 0.83          |
| Lu                                 | (p.p.m.) | 0.469            | 0.227           | 0.221           | 0.418           | 0.876              | 0.472              | 0.285       | 0.438       | 0.617       | 0.301       | 0.37        | 0.374       | 0.207        | 0.062             | 0.319            | 0.029         | 0.417             | 0.344               | 0.497            | 0.14          |
| density                            | (g/cm3)  | 2.416            | 2.353           | 2.327           | 2.280           | 2.439              | 2.571              | 2.368       | 2.421       | 2.454       | 2.123       | 2.614       | 2.389       | 2.266        | 2.483             | 2.618            | 2.121         | 2.704             | 2.589               | 2.299            | 2.583         |
| s.d.                               | (g/cm3)  | 0.005            | 0.005           | 0.002           | 0.007           | 0.002              | 0.012              | 0.005       | 0.005       | 0.008       | 0.004       | 0.008       | 0.011       | 0.004        | 0.008             | 0.003            | 0.004         | 0.003             | 0.005               | 0.004            | 0.004         |

Keys: TL: Tufo Lionato; Ps: paleosol; Pn: Pozzolane Nere; Pzz: Pozzolanelle; u: unaltered; lu: likely unaltered; a: altered; ImQ: Imater quarry; L1: Laurentina 1; L4: Laurentina 4; Zolf: Zolforata di Pomezia mine; ms: mushroom-like; hor fol: subhorizontal foliation in yellow and whitish zoned domains; pres lith: preserved. unaltered lithon; czh: concentric zonation halos; vah: Liesegang-like bands; fp: non-systematic fracture pattern; na: not analysed; and bdl: below detection limit.

**Table DR5.** Results from mass balance calculation using the software GEO-ISO (Coelho, 2005), with reference to Fig. 8.

| Unit | Sample pair   | Volume change (%) | Mass change (%) | Regression function          | Regression Index | Inerts                 |
|------|---------------|-------------------|-----------------|------------------------------|------------------|------------------------|
| Pzz  | AGL48-AGL47   | -3.09             | -7.22           | $Cf = -0.418 + (1.206 * Co)$ | 0.9999993        | Zr, Ge, $TiO_2$        |
| TL   | AGL00-AGL46   | 18.34             | 21.64           | $Cf = -0.285 + (0.905 * Co)$ | 0.99999956       | Zr, Ge, $TiO_2$        |
| Ps   | AGLps3-AGLps2 | -15.63            | -24.88          | $Cf = 0.028 + (1.287 * Co)$  | 0.99999975       | $TiO_2$ , $Na_2O$ , Nb |
| Pn   | AGL49-AGL45   | -26.37            | -40.35          | $Cf = -0.736 + (1.499 * Co)$ | 0.99999675       | Zr, Ge, $TiO_2$        |

Keys: Pzz: Pozzolanelle; TL: Tufo Lionato; Ps: paleosol; Pn: Pozzolane Nere; Cf: concentration of the component "i" in the transformed rock; and Co: concentration of the component "i" in the original rock.

**Table DR6.** Results from mass balance calculation using the software GEO-ISO (Coelho, 2005), with reference to Fig. DR3.

| Unit | Sample pair  | Volume change (%) | Mass change (%) | Regression function          | Regression Index | Inerts                   |
|------|--------------|-------------------|-----------------|------------------------------|------------------|--------------------------|
| TL   | AGL00-AGL02  | 17.76             | 14.68           | $Cf = -0.167 + (0.872 * Co)$ | 0.99999971       | Zr, Ge, TiO <sub>2</sub> |
| TL   | AGL00-AGL03  | -0.29             | -3.96           | $Cf = -0.394 + (1.042 * Co)$ | 0.99999901       | Zr, Ge, TiO <sub>2</sub> |
| TL   | AGL00-AGL04  | 3.93              | -1.91           | $Cf = -0.106 + (1.020 * Co)$ | 0.99999988       | Zr, Ge, TiO <sub>2</sub> |
| TL   | AGL00-AGL05  | 10.76             | 4.54            | $Cf = -0.040 + (0.957 * Co)$ | 0.99999996       | Zr, Ge, TiO <sub>2</sub> |
| TL   | AGL00-AGL25  | -23.89            | -18.99          | $Cf = -0.016 + (1.184 * Co)$ | 0.99999999       | Zr, Ge, TiO <sub>2</sub> |
| TL   | AGL00-AGL26  | -16.53            | -18.17          | $Cf = 0.006 + (1.165 * Co)$  | 0.99999999       | Zr, Ge, TiO <sub>2</sub> |
| TL   | AGL00-AGL27  | -7.12             | -6.93           | $Cf = 0.248 + (1.058 * Co)$  | 0.99999965       | Zr, Ge, TiO <sub>2</sub> |
| TL   | AGL00-AGL28  | -5.10             | -3.59           | $Cf = 0.505 + (1.042 * Co)$  | 0.9999983        | Zr, Ge, TiO <sub>2</sub> |
| TL   | AGL00-AGL29  | 5.52              | -7.29           | $Cf = 0.054 + (1.091 * Co)$  | 0.99999998       | Zr, Ge, TiO <sub>2</sub> |
| TL   | AGL00-AGL30  | 4.05              | 12.58           | $Cf = -0.057 + (0.866 * Co)$ | 0.99999995       | Zr, Ge, TiO <sub>2</sub> |
| TL   | AGL00-AGL31  | -21.85            | -22.71          | $Cf = -0.113 + (1.308 * Co)$ | 0.99999996       | Zr, Ge, TiO <sub>2</sub> |
| TL   | AGL00-AGL37b | 13.17             | 6.15            | $Cf = -0.050 + (0.911 * Co)$ | 0.99999996       | Zr, Ge, TiO <sub>2</sub> |

Keys: TL: Tufo Lionato; Cf: concentration of the component "i" in the transformed rock; and Co: concentration of the component "i" in the original rock.



## Figures

**Figure DR1.** Photographs of alteration meso-structures from the Laurentina 1 to 4 (distal) outcrops.

(a) Panoramic view (photomosaic) of the main exposure from the Laurentina 1 locality. (b) Zoned alteration within the Tufo Lionato ignimbrite (Laurentina 1). Note the draped upper edge of the altered area. (c) Zoned alteration within the Tufo Lionato ignimbrite (Laurentina 1). Note the mushroom-like structure with stem and domal cap, and the draped upper edge of the altered area. (d) Mushroom-like structures in the Tufo Lionato ignimbrite (Laurentina 1). Note that these structures root into the cap of underlying similar structures. (e) Subvertical stem of a mushroom-like structure developed along a visible fracture (Tufo Lionato, Laurentina 1). (f), (g), and (h) Subvertical and subhorizontal fractures surrounded by a halo of incipient alteration (Tufo Lionato, Laurentina 1). (i) Panoramic view (photomosaic) of the Laurentina 4 exposure. (j) and (k) Close-up views from the previous photograph showing the cloud-like alteration structure with upward fringes along the upper edge of the alteration cloud (Tufo Lionato, Laurentina 4). (l) Panoramic view (photomosaic) of the Laurentina 2 exposure. (m) Contact between the altered Tufo Lionato ignimbrite (above) and the altered paleosol (below) (Laurentina 2). Note that the Tufo Lionato is brecciated and the alteration structures (halos, zoning) are confined by the underlying paleosol. (n) Alteration structures within the Tufo Lionato, paleosol, and Pozzolane Nere (Laurentina 2). Note also, in this case, the confinement of these alteration structures within each unit. (o) Tufo Lionato ignimbrite altered and affected by a subhorizontal foliation fabric, which mainly consists of serrate and narrowly-spaced subhorizontal fractures accompanied by alteration and mineralization bands (Laurentina 3). (p) The subhorizontal foliation shown in (o) is, in places, undulated along subvertical bands (Laurentina 3). (q) Subvertical and steep fluid-conductive fractures (bordered by a red halo) cut across the subhorizontal foliation shown in previous photographs (Laurentina 3). At the upper tip of the fractures, subhorizontal mushroom-like alteration structures can form analogously to the Laurentina 1 exposures (see Figs. DR1a to DR1d). (r) Close-up view of the previous photograph (Laurentina 3). Small mushroom-like alteration structures can form from the domal cap of underlying mushroom-like structures.

**Figure DR2.** X-ray diffraction patterns for the unaltered Tufo Lionato from the Imater quarry (a) and the altered counterparts from the Laurentina outcrops (b-d). (a) unaltered Tufo Lionato; (b) Laurentina 1 outcrop; (c) Laurentina 2 outcrop; (d) Laurentina 4 outcrop. Keys: Ab: Albite; Anl: Analcime; Aug: Augite; Brt: Barite; Cbz: Chabazite; Gr: Greigite; Gt: Goethite; Hal-7: Halloysite-7Å; Hal-10: Halloysite-10Å; Jar: Jarosite; Lct: Leucite; Mrc: Marcasite; Ph: Phlogopite; Phl: Phillipsite; Py: Pyrite; and Qtz: Quartz.

**Figure DR3.** Results from the chemical mass balance analysis where, unlike Fig. 8, Sulfur is omitted to highlight other element gains and losses (Tables DR4 and DR6). (a) Pozzolanelle; (b)-(f) different alteration structures within the Tufo Lionato; (g) paleosol; (h) Pozzolane Nere. Numbers on the y-axis refer to a factor of loss (negative) or gain (positive) in mass (i.e., +1 stands for +100% of enrichment of the  $i$  component).  $\Delta M_i$  is the mass change in element  $i$ ,  $C_0^i$  is the original concentrations of the  $i$  component within the unaltered rocks.

**Figure DR4.** Color version of Fig. 9. Conceptual scenario of hydrothermal alteration progression eventually leading to the formation of a fluid barrier (caprock) and to consequent fluid overpressure, hydro-fracturing, and possible paroxysm in a progressive and cyclic fashion.



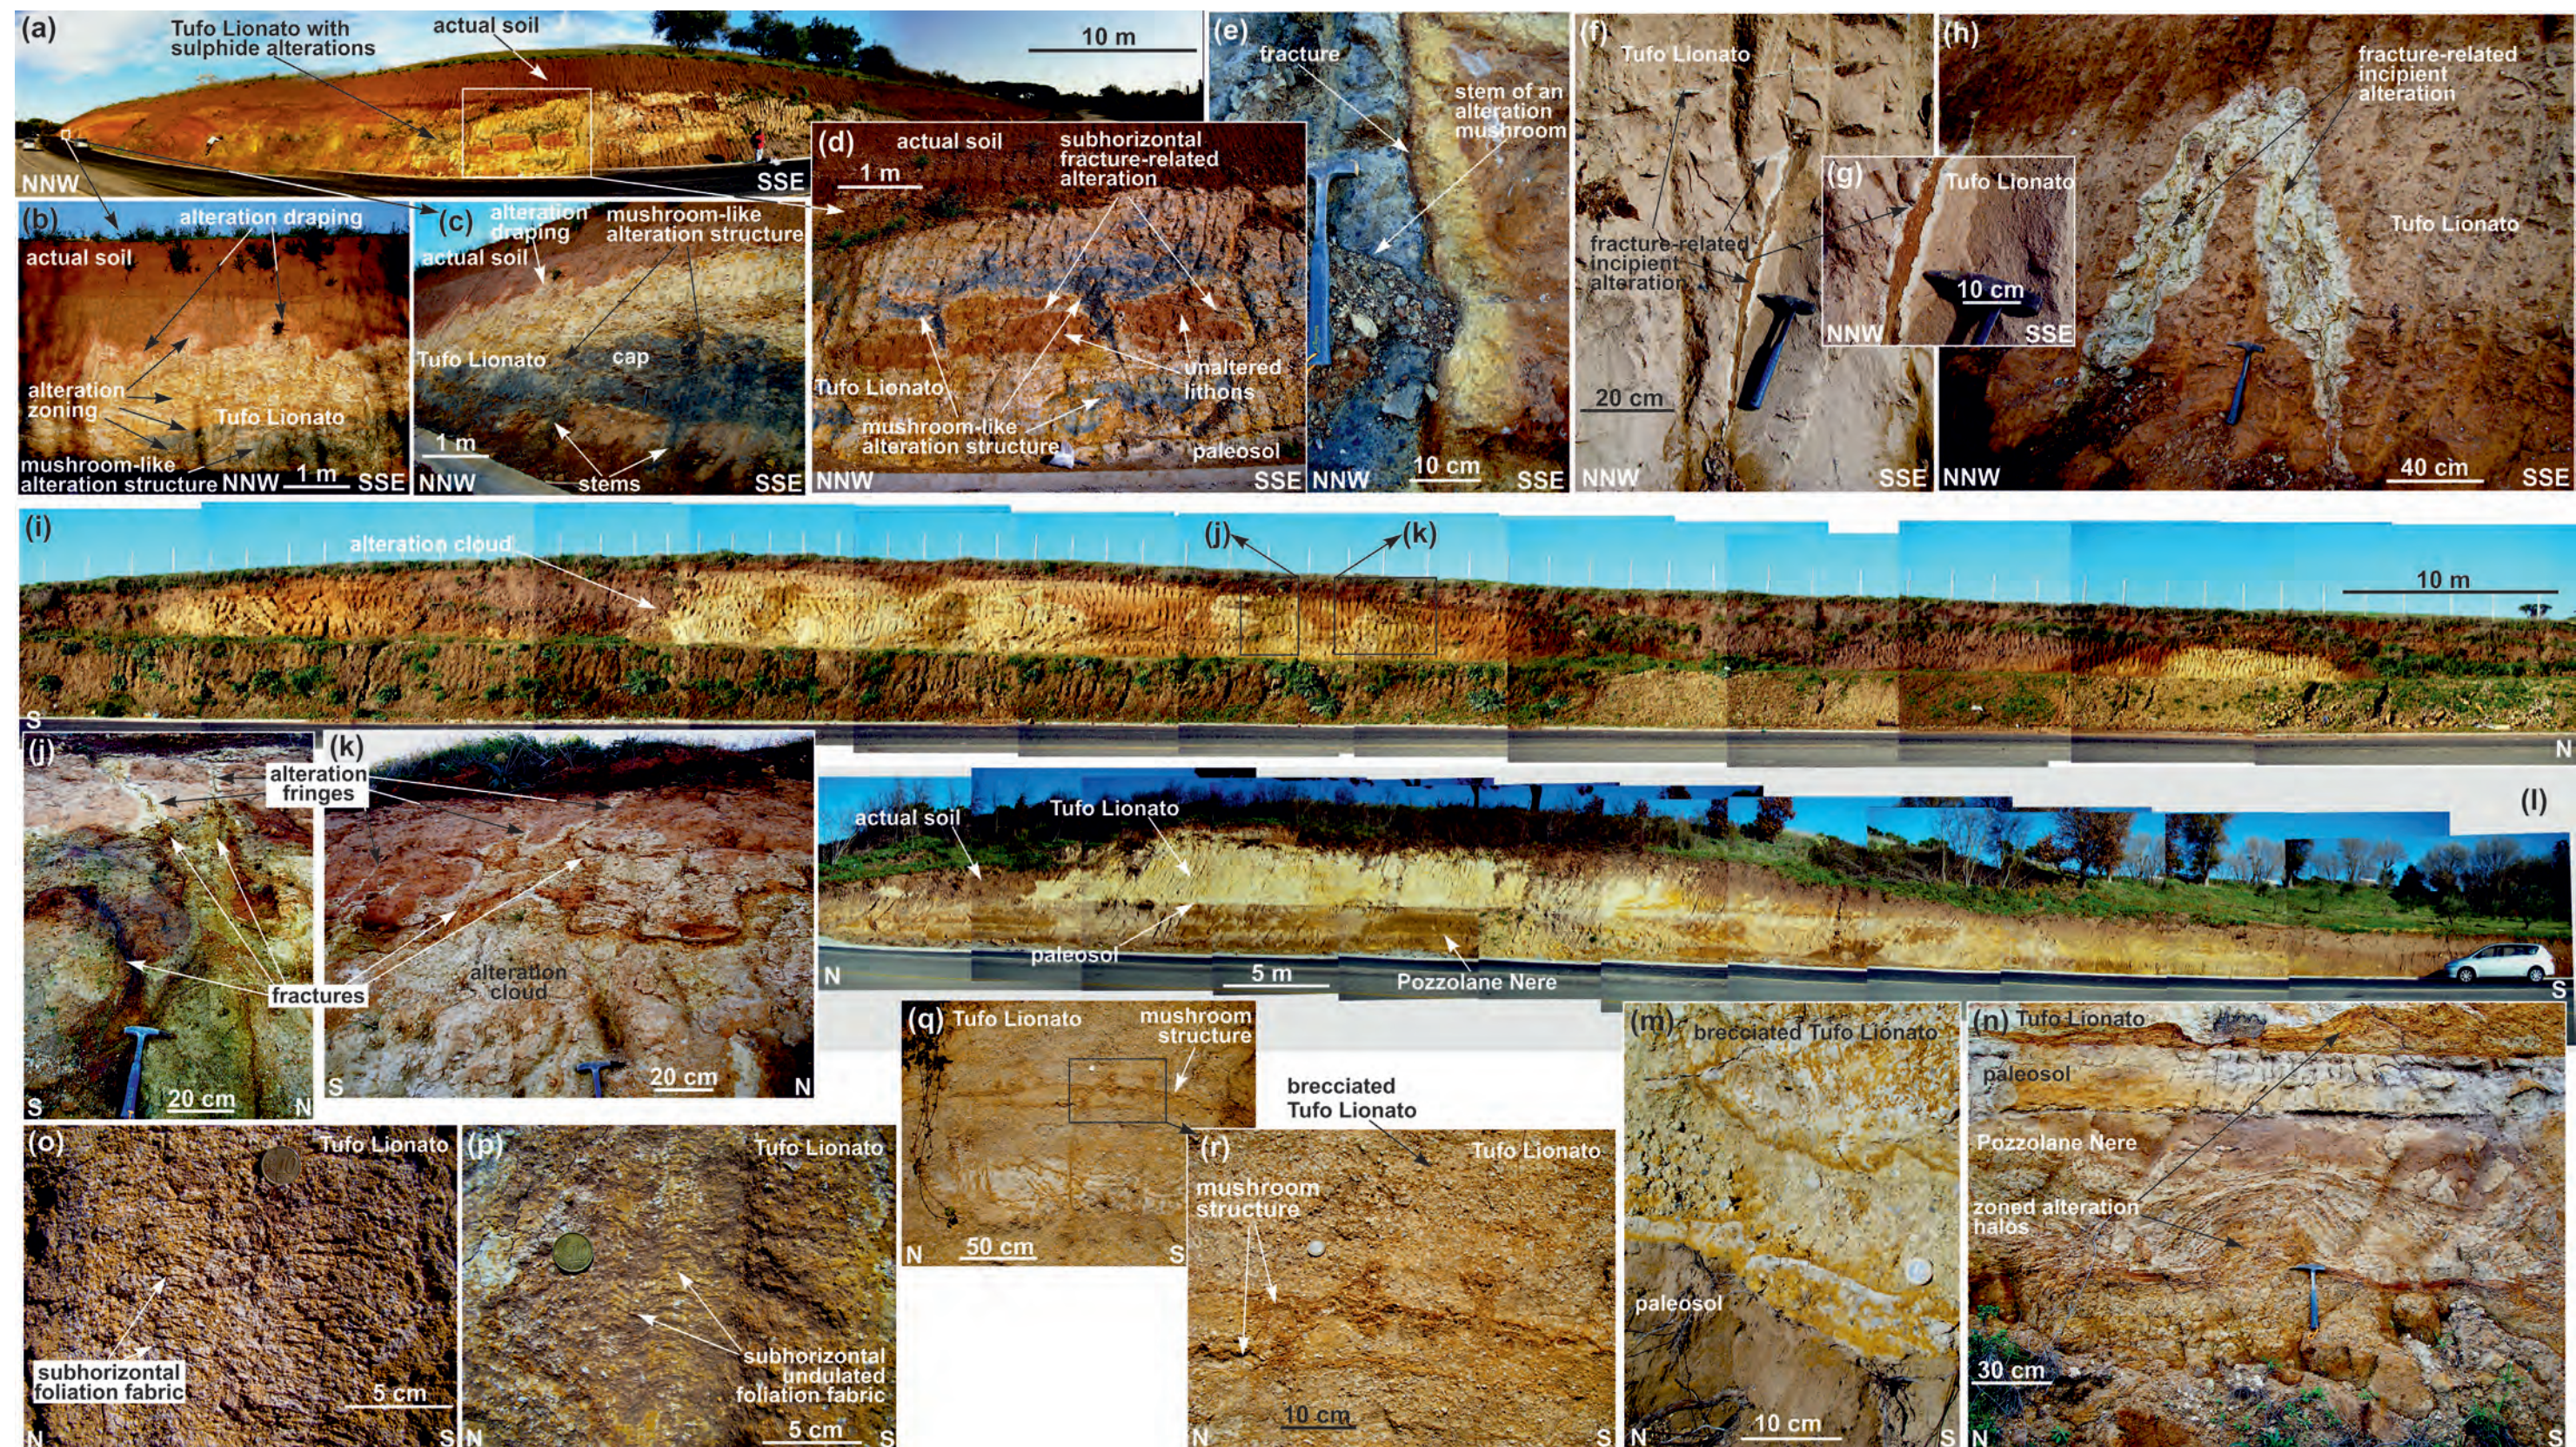

Figure DR1



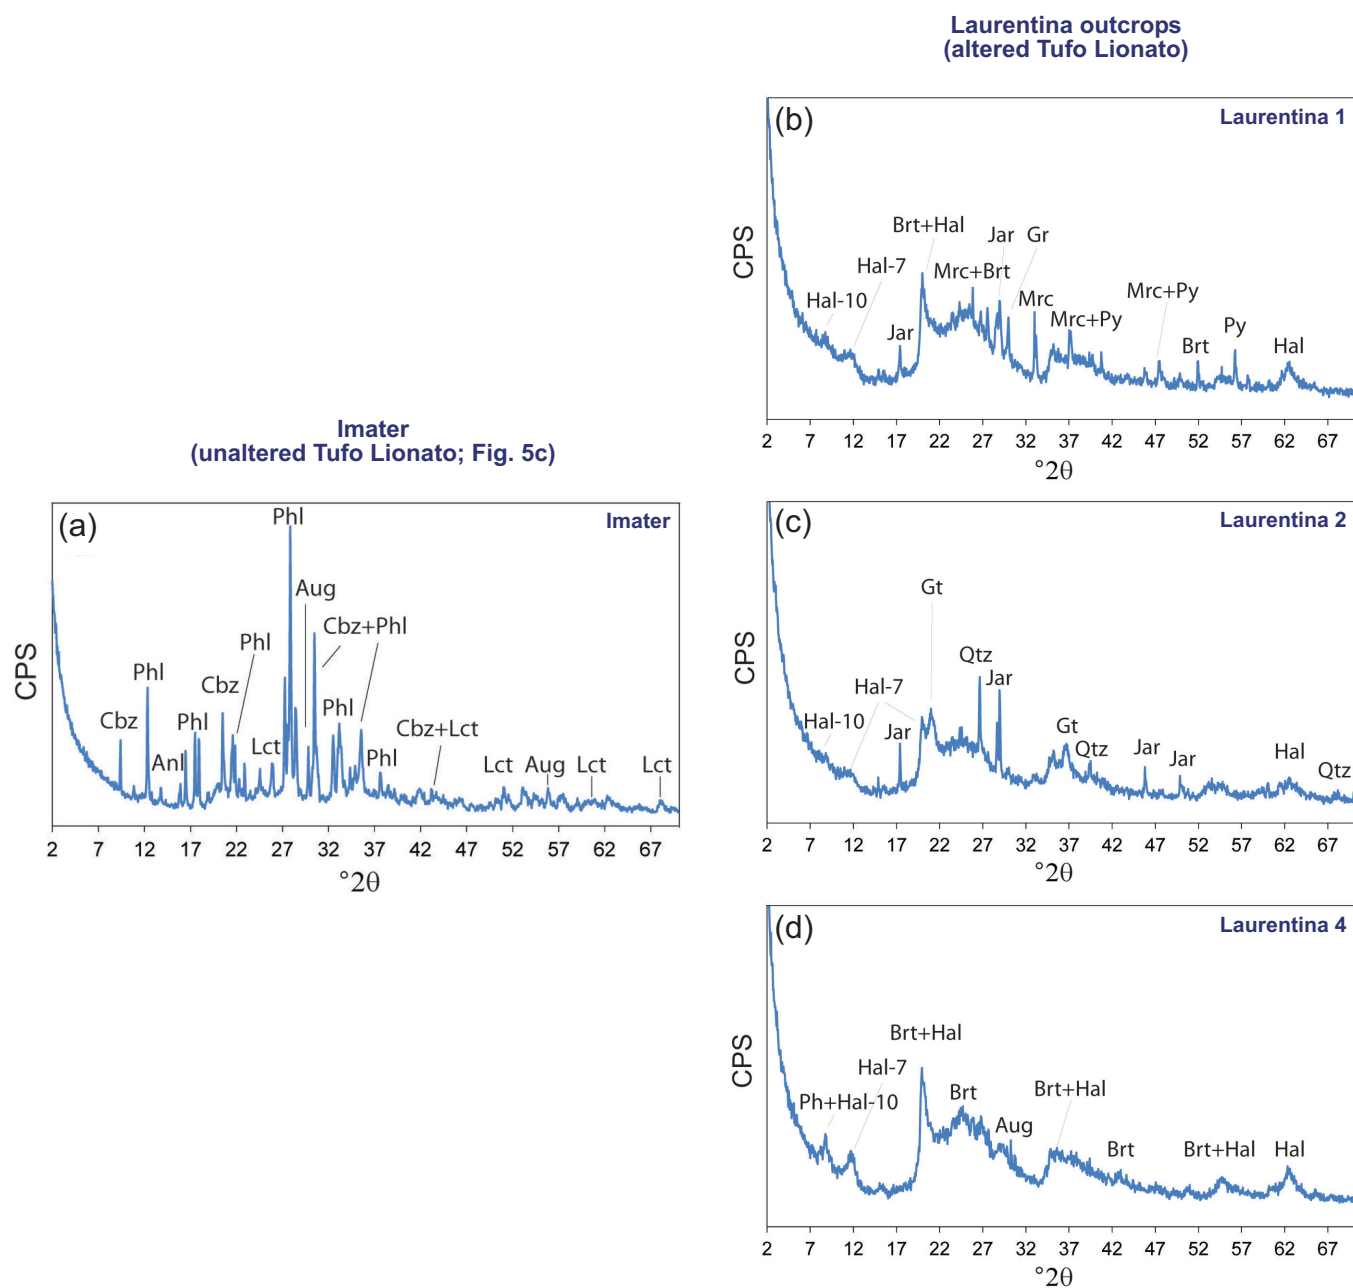

Figure DR2

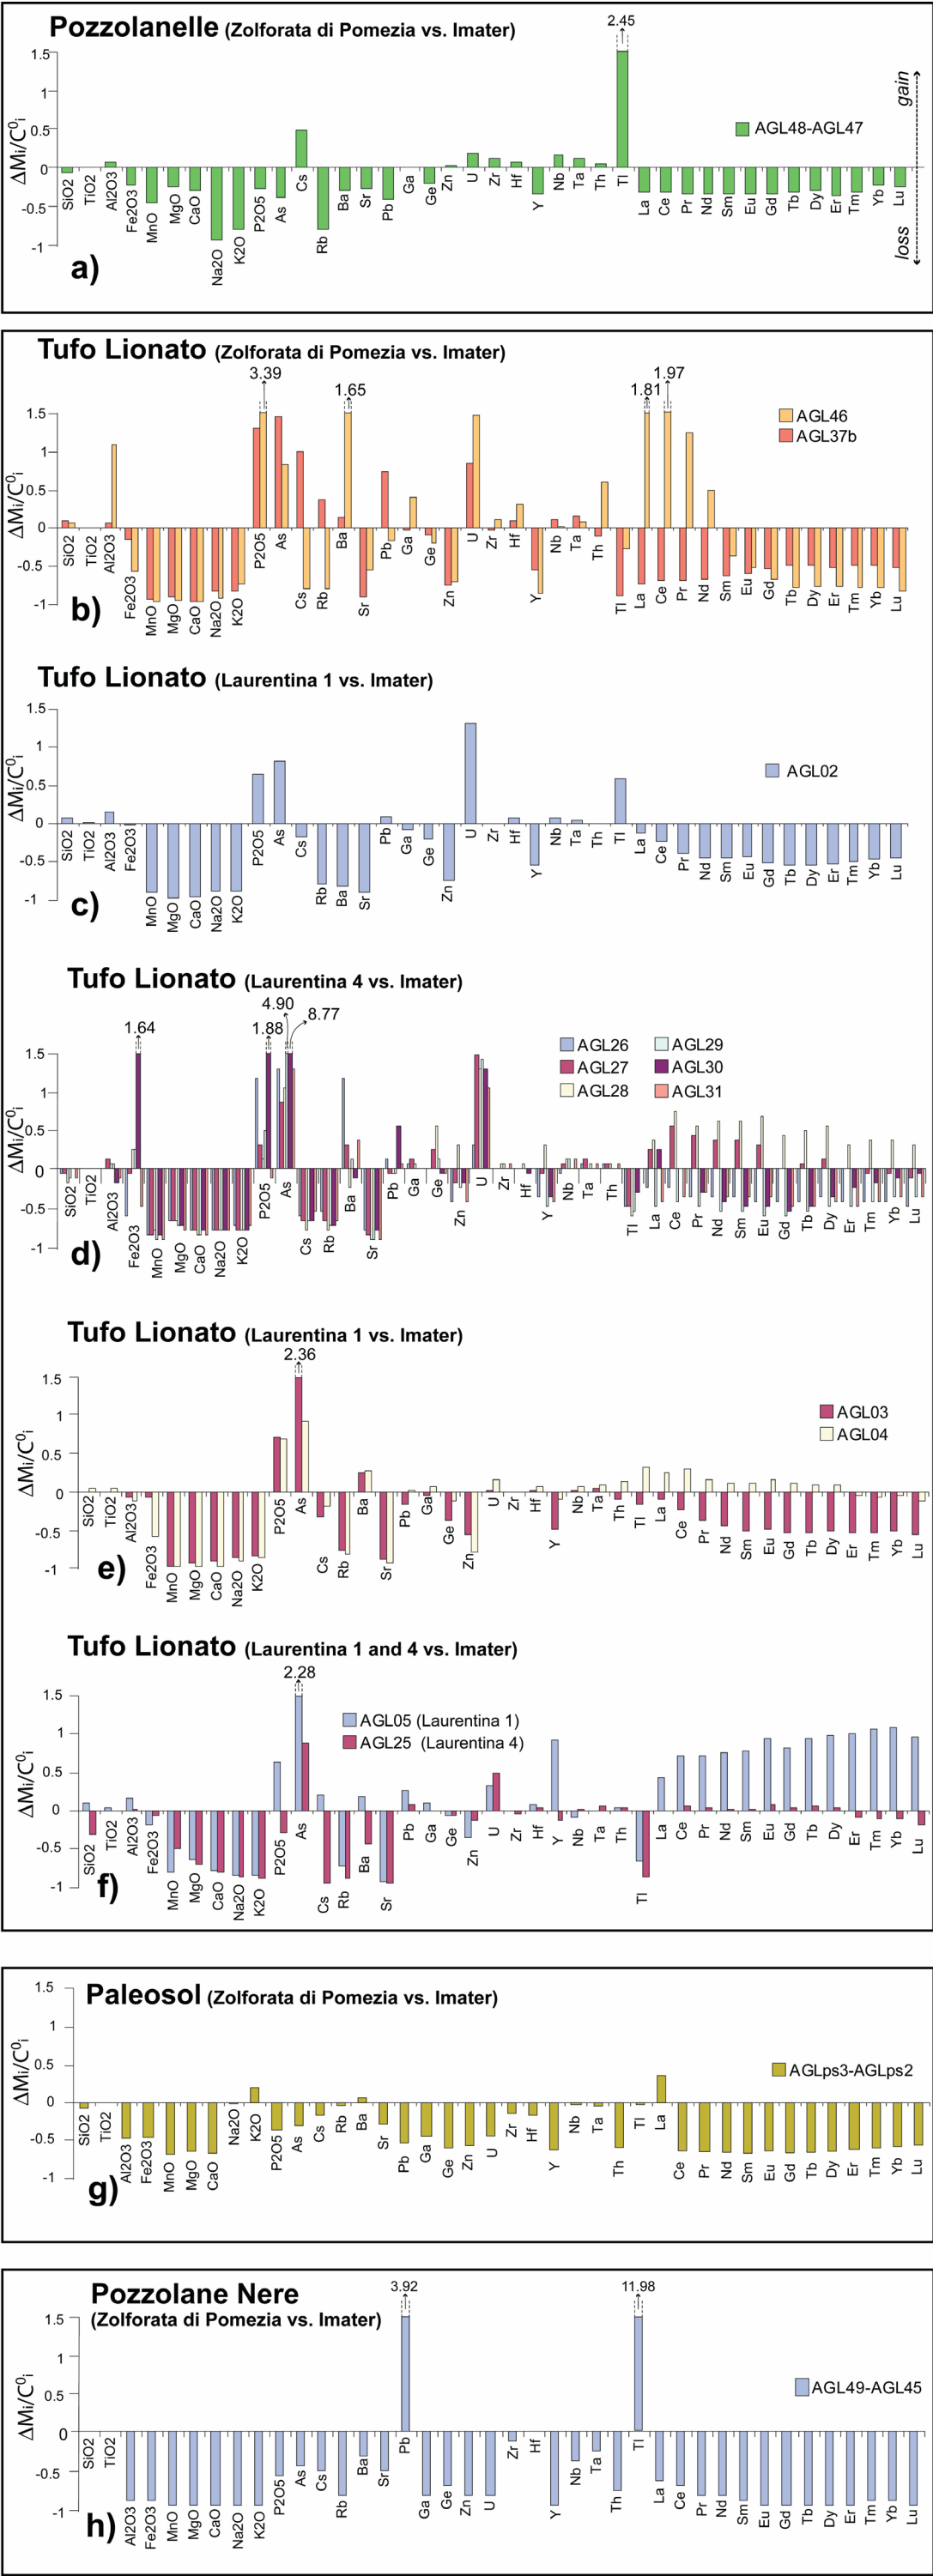

Figure DR3

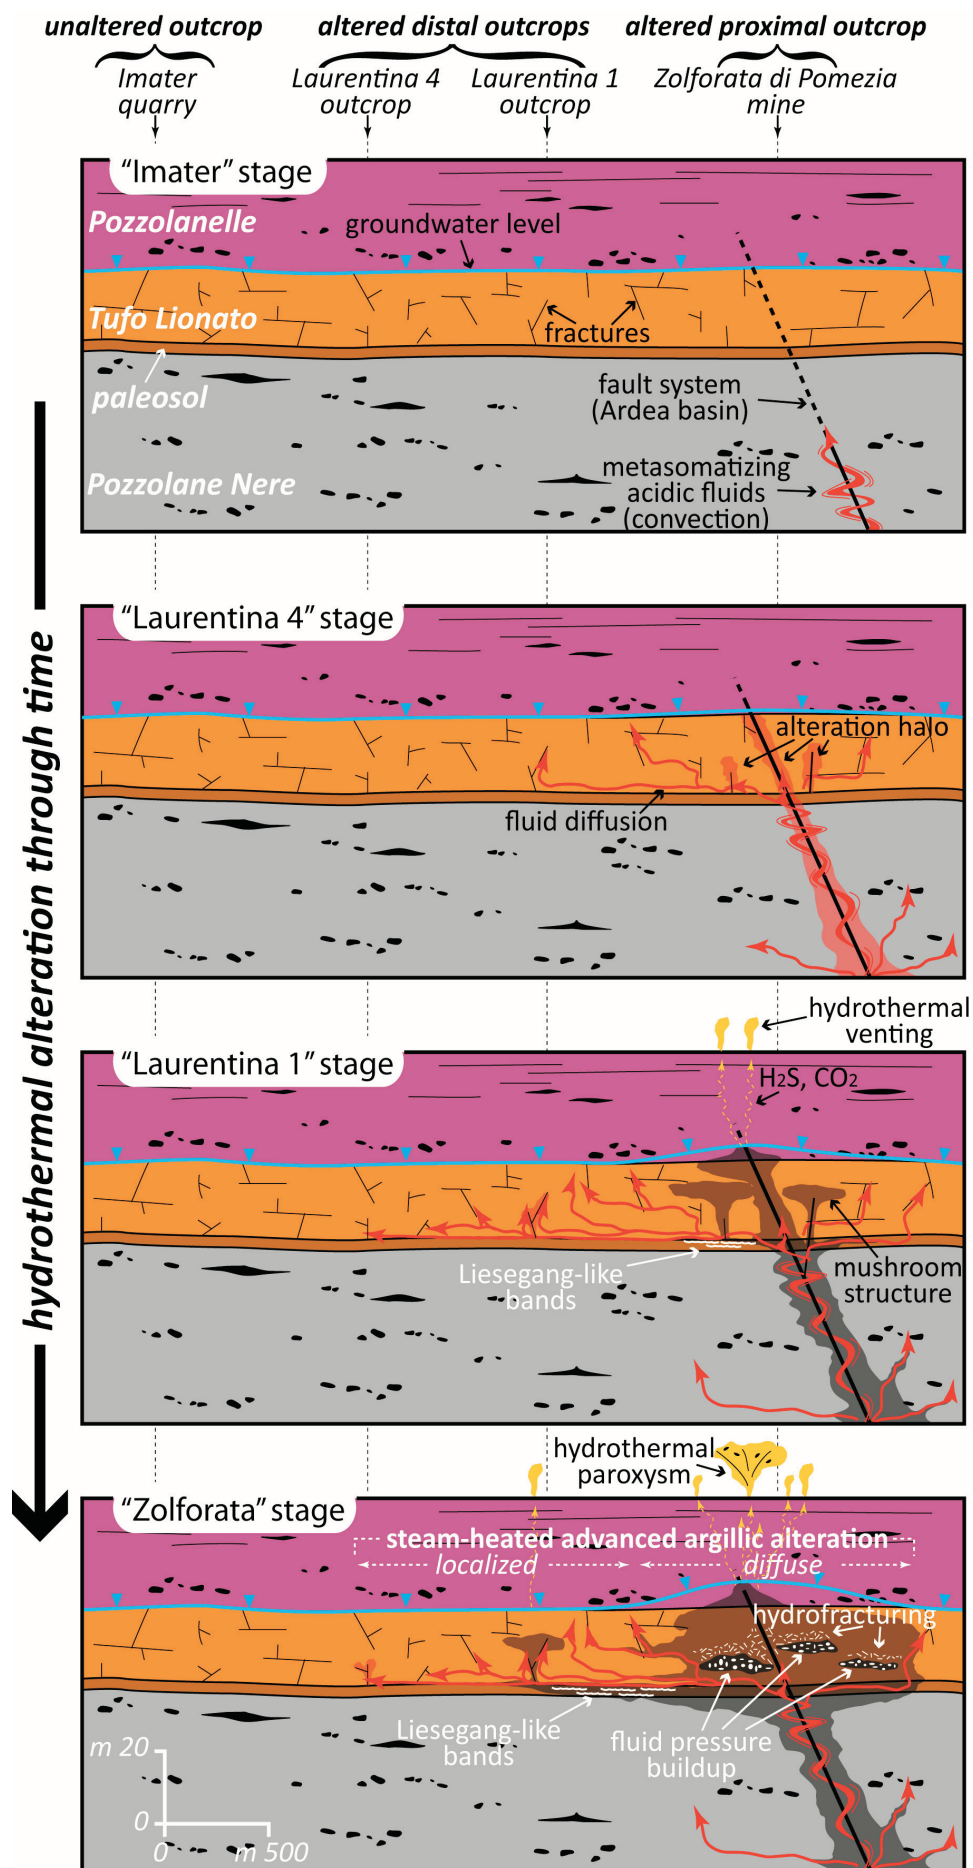

Figure DR4

## Movies

**Movie DR1.** Movie showing an actively-degassing pond within the Zolforata di Pomezia area. This pond is visible also on Google Maps and it is located 600-700 m to the southwest of the red lake in the Zolforata di Pomezia former mine area.

**Movie DR2.** Movie showing an actively-degassing small pond within the Zolforata di Pomezia area, close to the pond shown in the Movie DR1.

**Movie DR3.** Movie showing a panoramic view within the the Zolforata di Pomezia former mine area. Note the S-rich mineralizations and connected hydrothermal alterations of the Tufo Lionato and Pozzolanelle ignimbrites.

**Movie DR4.** Movie showing the southern bank of the red lake within the Zolforata di Pomezia former mine area (Fig. 3). Note the Liesegang-like bands in the altered compact paleosol (Figs. 3i to 3k) and, above, the brecciated state of the altered Tufo Lionato ignimbrite (Figs. 3l to 3n).
